# Supplementary material for: Rutin ameliorates carbon tetrachloride (CCl4)-induced hepatorenal toxicity and hypogonadism in male rats
Source: PeerJ. 2019 May 29;7:e7011. doi: 10.7717/peerj.7011 (PMC6545103; doi:10.7717/peerj.7011)
Supplement: Data S1 [file peerj-07-7011-s001.xlsx]

## Sheet: liver markers
									Albumin	Protein	Bilirubin	ALP	AST	ALT	Replicates	Group
									g/dl	g/dl	mg/dl	U/L	U/L	U/L
									3.8	7.1	0.43	35	57	33	1	Control
									3.1	7.1	0.41	38	58	35	2
									3.5	7.7	0.42	40	56	32	3
									3.3	7.8	0.45	34	54	33	4
									3.4	7.5	0.43	37	57	31	5
									1.7	4.4	0.78	98	164	90	1	CCl4
									1.2	4.8	0.75	92	169	81	2
									1.3	4.6	0.71	97	162	84	3
									1.9	4.8	0.72	94	167	82	4
									1.3	4.6	0.77	93	161	90	5
									3.4	7.8	0.44	42	52	30	1	Rutin
									3.6	7.7	0.47	38	58	28	2
									3.2	7.8	0.46	40	57	32	3
									3.4	7.3	0.48	37	59	28	4
									3.7	7.5	0.46	35	54	33	5
									2.8	6.4	0.53	65	75	52	1	Rutin+CCl4
									2.6	6.7	0.54	71	74	57	2
									2.7	6.1	0.57	69	73	50	3
									2.8	6.4	0.56	64	74	50	4
									2.4	6.8	0.53	69	72	51	5

## Sheet: kidney markers
			Uric acid	Creatinine	Urea	Replicates	Group
			mg/dl	mg/dl	mg/dl
			2.8	0.25	28	1	Control
			2.7	0.21	27	2
			2.9	0.21	24	3
			2.4	0.26	25	4
			2.6	0.23	22	5
			4.4	0.92	52	1	CCl4
			4.9	0.91	57	2
			4.6	0.95	59	3
			4.8	0.92	58	4
			4.3	0.91	54	5
			2.5	0.26	25	1	Rutin
			2.2	0.21	28	2
			2.7	0.24	23	3
			2.6	0.24	27	4
			2.2	0.28	28	5
			2.7	0.54	29	1	Rutin+CCl4
			2.4	0.52	28	2
			2.9	0.51	31	3
			3	0.52	34	4
			2.6	0.57	32	5

## Sheet: lipid profile
			Group	Replicates	TC (mg/dl)	TGs (mg/dl)	HDL-C (mg/dl)	LDL-C (mg/dl)	VLDL-C (mg/dl)
			Control	1	115	125	42	68	25
				2	117	122	47	63.6	24.4
				3	116	127	43	68	25.4
				4	110	124	41	69	24.8
				5	115	128	47	64	25.6
			CCl4	1	204	205	28	166	41
				2	212	200	31	169	40
				3	207	207	25	163	41.4
				4	205	203	29	167	40.6
				5	210	208	30	168	41.6
			Rutin	1	118	125	38	68	25
				2	112	121	45	65	24.2
				3	118	127	38	68	25.4
				4	118	127	41	61	25.4
				5	115	122	42	62	24.4
			Rutin+CCl4	1	185	134	37	95	26.8
				2	181	133	30	90	26.6
				3	187	132	33	91	26.4
				4	184	137	37	91	27.4
				5	182	134	35	94	26.8

## Sheet: antioxidant activities
											Testis				Kidney				Liver				Replicates	Group
											MDA	GPx	SOD	CAT U/mg	MDA	GPx	SOD	CAT U/mg	MDA	GPx	SOD	CAT
											nmol/g	mU/mg	U/mg protein	protein	nmol/g	mU/mg	U/mg protein	protein	nmol/g	mU/mg	U/mg protein	U/mg
											tissue	protein			tissue	protein			tissue	protein		protein
											11	66	70	42	14	67	62	38	19	62	67	43	1	Control
											11	70	64	38	9	64	59	39	14	64	62	39	2
											14	62	69	41	12	63	58	41	12	70	61	44	3
											9	67	70	35	10	62	61	43	19	69	65	35	4
											10	64	67	36	7	69	54	36	18	67	64	40	5
											28	39	24	11	28	28	30	15	42	31	32	15	1	CCl4
											29	32	29	14	25	25	33	21	35	29	30	14	2
											33	37	30	19	31	28	35	18	40	25	25	11	3
											35	35	28	21	29	25	31	21	39	22	28	10	4
											30	31	27	18	28	27	30	19	37	29	27	9	5
											10	62	66	38	11	65	58	35	13	66	63	38	1	Rutin
											8	68	72	33	9	66	57	37	12	67	60	39	2
											7	67	64	39	10	69	62	40	15	70	67	44	3
											9	70	65	36	8	64	63	38	17	68	64	42	4
											12	69	64	37	9	62	59	40	16	68	68	40	5
											21	56	48	29	13	45	45	29	24	45	42	29	1	Rutin+CCl4
											17	52	42	26	11	43	44	27	25	42	45	31	2
											16	50	42	32	14	50	51	29	21	47	50	25	3
											22	50	44	31	16	46	48	32	27	44	48	30	4
											16	54	49	28	14	49	46	35	29	50	40	28	5

## Sheet: reproductive hormones
								Sperm parameters			Hormones			Replicates	Group
								sperm Abnormality	sperm Motility %	sperm Counts	FSH	LH ng/ml	T
								%		Million/ml	ng/ml		pg/ml
								12	86	85	0.53	1.8	3.8	1	Control
								15	79	86	0.47	1.4	3.9	2
								18	85	88	0.56	1.1	4.2	3
								11	87	84	0.57	1.1	4	4
								17	82	89	0.52	1.5	3.6	5
								40	35	50	0.26	0.69	1.4	1	CCl4
								45	31	56	0.28	0.61	1.3	2
								45	38	58	0.27	0.67	1.7	3
								47	35	59	0.28	0.65	1.9	4
								40	32	52	0.25	0.66	1.1	5
								15	87	82	0.53	1.4	3.6	1	Rutin
								14	84	87	0.54	1.8	3.3	2
								12	85	88	0.59	1.6	4	3
								11	87	90	0.58	1.53	3.4	4
								17	79	85	0.56	1.6	3.5	5
								25	53	68	0.35	0.9	3.7	1	Rutin+CCl4
								22	50	75	0.37	0.92	3.2	2
								20	52	70	0.34	0.87	3.8	3
								25	55	67	0.33	0.89	3.1	4
								27	57	73	0.38	0.94	3.7	5
